# Supplementary material
Source: PubMed Central journal article supplement (PMC7960153)
Supplement: 15-00736.pdf [file 15-00736.pdf]

**On-line Table 1: Specificity, sensitivity, and AUC<sup>a</sup>**

|                      | Infection | Control | P Value | Specificity         | Sensitivity         | AUC              |
|----------------------|-----------|---------|---------|---------------------|---------------------|------------------|
| Psoas musculature    |           |         |         |                     |                     |                  |
| T2 hyperintensity    |           |         |         |                     |                     |                  |
| None                 | 4         | 46      | NS      |                     |                     |                  |
| Present <sup>b</sup> | 47        | 4       | <.001   | 92% (80%–97.4%)     | 92.1% (80%–97.4%)   | 0.92 (0.87–0.97) |
| Enhancement          |           |         |         |                     |                     |                  |
| None                 | 5         | 34      | NS      |                     |                     |                  |
| Present              | 40        | 5       | <.001   | 87.1% (71.8%–95.2%) | 88.9% (75.2%–95.8%) | 0.88 (0.81–0.95) |
| Abscess              |           |         |         |                     |                     |                  |
| None                 | 29        | 38      | NS      |                     |                     |                  |
| Present              | 18        | 1       | <.001   | 97.4% (84.9%–99.9%) | 38.3% (24.9%–53.6%) | 0.67 (0.59–0.74) |
| Vertebral bodies     |           |         |         |                     |                     |                  |
| T1                   |           |         |         |                     |                     |                  |
| Isointense           | 3         | 40      | NS      |                     |                     |                  |
| Hypointense          | 46        | 10      | <.001   | 80% (65.8%–89.5%)   | 90.2% (77.8%–96.3%) | 0.85 (0.78–0.92) |
| Hyperintense         | 2         | 0       | NS      |                     |                     |                  |
| T2                   |           |         |         |                     |                     |                  |
| Isointense           | 3         | 37      | NS      |                     |                     |                  |
| Hypointense          | 3         | 0       | NS      |                     |                     |                  |
| Hyperintense         | 45        | 13      | <.001   | 74% (59.7%–85.4%)   | 88.2% (76.1%–95.6%) | 0.81 (0.74–0.89) |
| Endplates            |           |         |         |                     |                     |                  |
| Intact               | 9         | 42      | NS      |                     |                     |                  |
| Eroded               | 6         | 1       | NS      |                     |                     |                  |
| Destroyed            | 36        | 7       | <.001   | 86% (73.3%–94.2%)   | 70.6% (56.2%–82.5%) | 0.78 (0.70–0.86) |
| Enhancement          |           |         |         |                     |                     |                  |
| None                 | 0         | 31      | NS      |                     |                     |                  |
| Endplate             | 17        | 6       | .03     | 84.6% (68.8%–93.6%) | 37.8% (24.2%–53.5%) | 0.61 (0.52–0.70) |
| Diffuse              | 28        | 2       | <.001   | 94.9% (81.4%–99.1%) | 62.2% (46.5%–75.8%) | 0.78 (0.70–0.87) |
| Discs                |           |         |         |                     |                     |                  |
| Height               |           |         |         |                     |                     |                  |
| Normal               | 11        | 33      | NS      |                     |                     |                  |
| Loss <50%            | 19        | 13      | NS      |                     |                     |                  |
| Loss >50%            | 12        | 4       | NS      |                     |                     |                  |
| Increased            | 9         | 0       | .003    | 100% (92.9%–100%)   | 17.6% (8.4%–30.9%)  | 0.59 (0.54–0.64) |
| T2                   |           |         |         |                     |                     |                  |
| Isointense           | 4         | 34      | NS      |                     |                     |                  |
| Hypointense          | 3         | 4       | NS      |                     |                     |                  |
| Hyperintense         | 44        | 12      | <.001   | 86.3% (73.7%–94.3%) | 76% (61.8%–86.9%)   | 0.81 (0.74–0.89) |
| Enhancement          |           |         |         |                     |                     |                  |
| None                 | 5         | 30      | NS      |                     |                     |                  |
| Focal                | 23        | 4       | <.001   | 89.7% (74.8%–96.7%) | 51.1% (35.9%–66.1%) | 0.70 (0.62–0.79) |
| Rim                  | 14        | 3       | .01     | 92.3% (79.1%–98.4%) | 31.1% (18.2%–46.6%) | 0.62 (0.54–0.70) |
| Diffuse              | 3         | 2       | NS      |                     |                     |                  |
| Epidural Space       |           |         |         |                     |                     |                  |
| Phlegmon             |           |         |         |                     |                     |                  |
| None                 | 9         | 37      | NS      |                     |                     |                  |
| Present              | 38        | 2       | <.001   | 94.9% (82.7%–99.4%) | 80.9% (66.7%–90.9%) | 0.88 (0.81–0.95) |
| Abscess              |           |         |         |                     |                     |                  |
| None                 | 35        | 39      | NS      |                     |                     |                  |
| Present              | 11        | 0       | <.001   | 100% (91%–100%)     | 23.9% (12.6%–38.8%) | 0.62 (0.56–0.68) |

**Note:**—NS indicates not statistically significant ( $P > .05$ ).

<sup>a</sup> Values in parentheses are 95% confidence intervals.

<sup>b</sup> Imaging psoas sign.

**On-line Table 2: Positive likelihood ratios<sup>a</sup>**

|                                      | Positive Likelihood Ratio |
|--------------------------------------|---------------------------|
| Epidural phlegmon                    | 15.8 (4.06–61.2)          |
| Psoas abscess                        | 14.9 (2.10–106.9)         |
| Diffuse vertebral body enhancement   | 12.13 (3.09–47.7)         |
| Psoas T2 hyperintensity <sup>b</sup> | 11.5 (4.5–29.6)           |
| Psoas enhancement                    | 6.9 (3.0–15.8)            |
| Endplate destruction                 | 5.04 (2.48–10.2)          |
| Focal disc enhancement               | 4.98 (1.89–13.16)         |
| Rim disc enhancement                 | 4.04 (1.25–13.04)         |
| Vertebral body T1 hypointensity      | 4.51 (2.57–7.91)          |
| Disc T2 hyperintensity               | 3.59 (2.17–5.96)          |
| Vertebral body T2 hyperintensity     | 3.39 (2.1–5.47)           |
| Endplate vertebral body enhancement  | 2.46 (1.07–5.6)           |
| Epidural abscess                     | NA <sup>c</sup>           |
| Increased disc height                | NA <sup>c</sup>           |

**Note:**—NA indicates not applicable.

<sup>a</sup> Values in parentheses are 95% confidence intervals.

<sup>b</sup> Imaging psoas sign.

<sup>c</sup> No false-positive to calculate positive likelihood ratio.

**On-line Table 3: Negative likelihood ratios<sup>a</sup>**

|                                      | Negative Likelihood Ratio |
|--------------------------------------|---------------------------|
| Psoas T2 hyperintensity <sup>b</sup> | 0.09 (0.03–0.20)          |
| Vertebral body T1 hypointensity      | 0.12 (0.05–0.28)          |
| Psoas enhancement                    | 0.13 (0.06–0.29)          |
| Vertebral body T2 hyperintensity     | 0.16 (0.07–0.34)          |
| Disc T2 hyperintensity               | 0.18 (0.09–0.37)          |
| Epidural phlegmon                    | 0.20 (0.11–0.37)          |
| Endplate destruction                 | 0.34 (0.22–0.53)          |
| Diffuse vertebral body enhancement   | 0.40 (0.27–0.58)          |
| Focal disc enhancement               | 0.55 (0.40–0.74)          |
| Psoas abscess                        | 0.63 (0.50–0.79)          |
| Endplate vertebral body enhancement  | 0.74 (0.58–0.93)          |
| Rim disc enhancement                 | 0.75 (0.61–0.91)          |
| Epidural abscess                     | 0.76 (0.65–0.90)          |
| Increased disc height                | 0.82 (0.73–0.94)          |

<sup>a</sup> Values in parentheses are 95% confidence intervals.

<sup>b</sup> Imaging psoas sign.
